# Supplementary material for: Divergent Macroparasite Infections in Parapatric Swiss Lake-Stream Pairs of Threespine Stickleback (Gasterosteus aculeatus)
Source: PubMed Central journal article supplement (PMC4472517; doi:10.1371/journal.pone.0130579), 2015-06-18
Supplement: pone.0130579.s002.pdf [file pone.0130579.s002.pdf]

**Table S1. Sampling protocol.** Stickleback sampling dates, coordinates of the sampling locations, and waterway distance to the lake from the stream sampling site in the four study lake systems (Wohlen, Biel, Constance and Geneva) in Switzerland.

| <b>Lake system</b> | <b>Population</b> | <b>N of fish</b> | <b>Date</b> | <b>N</b>  | <b>E</b> | <b>Distance</b> |
|--------------------|-------------------|------------------|-------------|-----------|----------|-----------------|
| Wohlen             | Lake              | 31               | 8.5.2012    | 46°57'59" | 7°21'09" |                 |
|                    | Stream            | 30               | 8.5.2012    | 46°57'43" | 7°22'47" | 0.2 km          |
| Biel               | Lake              | 24               | 8.5.2012    | 47°03'05" | 7°04'33" |                 |
|                    | Stream            | 19               | 18.5.2012   | 47°02'24" | 7°03'29" | 2.1 km          |
| Constance          | Lake              | 40               | 5.4.2012    | 47°29'09" | 9°32'39" |                 |
|                    | Stream            | 30               | 5.4.2012    | 47°28'43" | 9°33'30" | 2.3 km          |
| Geneva             | Lake 1            | 40               | 24.4.2012   | 46°31'02" | 6°34'41" |                 |
|                    | Stream 1          | 40               | 23.4.2012   | 46°12'51" | 7°18'53" | 61.0 km         |
| Geneva             | Lake 2            | 25               | 7.5.2012    | 46°23'45" | 6°53'18" |                 |
|                    | Stream 2          | 24               | 30.4.2012   | 46°20'52" | 6°54'38" | 6.5 km          |
