# Supplementary material for: Divergent Macroparasite Infections in Parapatric Swiss Lake-Stream Pairs of Threespine Stickleback (Gasterosteus aculeatus)
Source: PubMed Central journal article supplement (PMC4472517; doi:10.1371/journal.pone.0130579), 2015-06-18
Supplement: pone.0130579.s003.pdf [file pone.0130579.s003.pdf]

**Table S2: Pairwise  $F_{ST}$ .** Pairwise genetic differentiation among the lake and stream stickleback ecotypes from four lake systems in Switzerland estimated as  $F_{ST}$  (below diagonal) and respective  $p$  values (above diagonal) based on a bootstrap procedure with 1000 replicates. The sample sizes (n) and sampling year for each population are indicated. See main text for details.

| System    | Habitat         | Year | Wohlen |        | Biel  |        | Constance |        | Geneva |          |        |          |
|-----------|-----------------|------|--------|--------|-------|--------|-----------|--------|--------|----------|--------|----------|
|           |                 |      | Lake   | Stream | Lake  | Stream | Lake      | Stream | Lake 1 | Stream 1 | Lake 2 | Stream 2 |
| Wohlen    | Lake (n=30)     | 2007 | -      | 0.722  | 0.027 | 0.074  | 0.001     | 0.001  | 0.001  | 0.001    | 0.001  | 0.001    |
|           | Stream (n=19)   | 2012 | -0.005 | -      | 0.105 | 0.209  | 0.001     | 0.001  | 0.001  | 0.001    | 0.001  | 0.001    |
| Biel      | Lake (n=28)     | 2012 | 0.014  | 0.011  | -     | 0.158  | 0.001     | 0.001  | 0.001  | 0.001    | 0.001  | 0.001    |
|           | Stream (n=13)   | 2012 | 0.014  | 0.009  | 0.011 | -      | 0.001     | 0.001  | 0.001  | 0.001    | 0.001  | 0.001    |
| Constance | Lake (n=30)     | 2007 | 0.144  | 0.139  | 0.157 | 0.180  | -         | 0.001  | 0.001  | 0.001    | 0.001  | 0.001    |
|           | Stream (n=32)   | 2012 | 0.151  | 0.152  | 0.168 | 0.173  | 0.038     | -      | 0.001  | 0.001    | 0.001  | 0.001    |
| Geneva    | Lake 1 (n=30)   | 2008 | 0.234  | 0.248  | 0.219 | 0.208  | 0.303     | 0.246  | -      | 0.001    | 0.163  | 0.100    |
|           | Stream 1 (n=30) | 2007 | 0.238  | 0.258  | 0.229 | 0.226  | 0.343     | 0.284  | 0.053  | -        | 0.001  | 0.001    |
|           | Lake 2 (n=30)   | 2012 | 0.264  | 0.279  | 0.252 | 0.246  | 0.349     | 0.288  | 0.007  | 0.031    | -      | 0.593    |
|           | Stream 2 (n=30) | 2012 | 0.296  | 0.311  | 0.281 | 0.275  | 0.379     | 0.315  | 0.010  | 0.065    | -0.003 | -        |
